# Supplementary material for: Poverty dynamics and health in late childhood in the UK: evidence from the Millennium Cohort Study
Source: PubMed Central journal article supplement (PMC6837248; doi:10.1136/archdischild-2018-316702), 2019-06-11
Supplement: archdischild-2018-316702supp001.pdf [file archdischild-2018-316702supp001.pdf]

**Supplementary materials**

**Supplementary Figure 1:** Directed acyclic graph for the current study

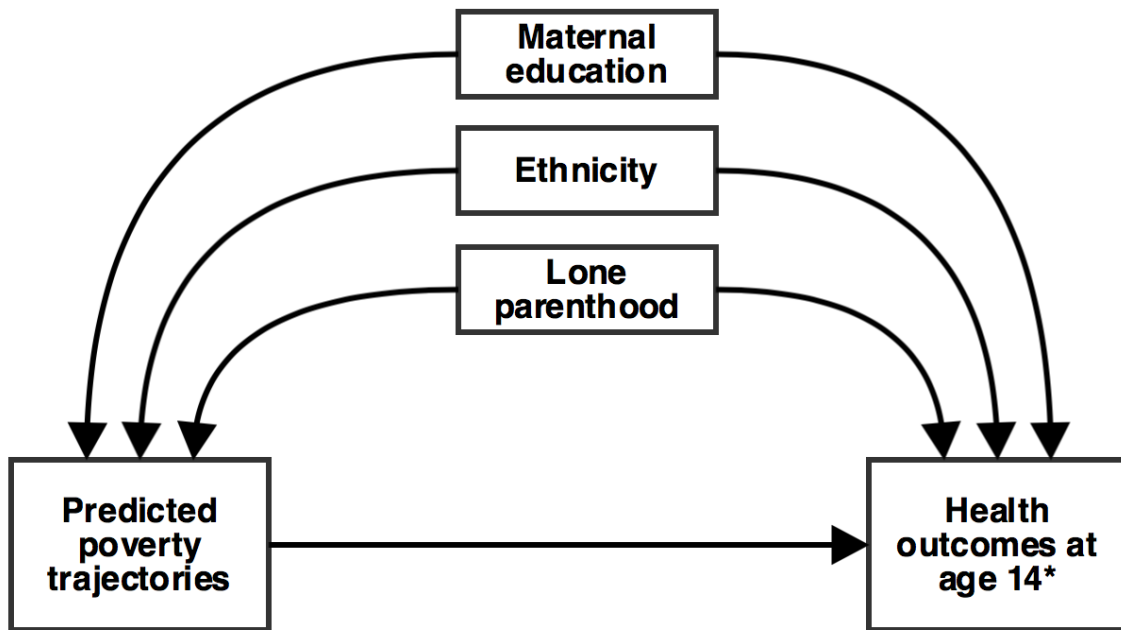

\*Health outcomes included socioemotional problems, obesity and longstanding illnesses.

**Supplementary Figure 2: Predicted probability for families in the MCS being in poverty at each wave of follow-up in different predicted poverty trajectories**

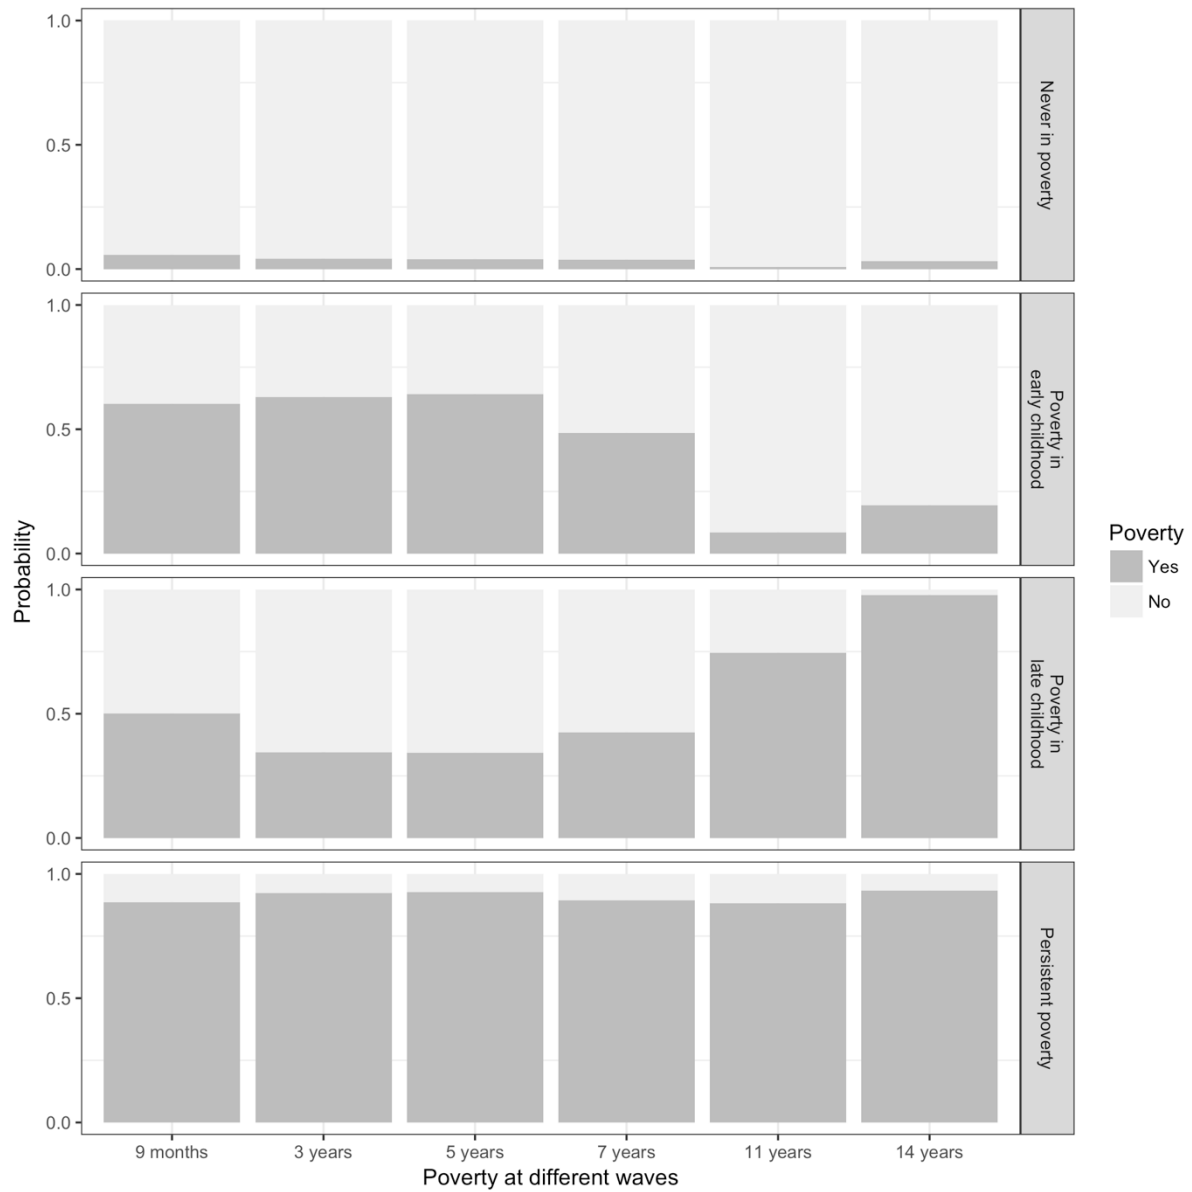

The figure shows the latent class model density estimate of the percentage of people in the underlying population in poverty at each follow-up time point in each of the predicted poverty trajectories. We took a cut-off of probability of 0.5 to consider whether families in a particular trajectory at a given time are in poverty.

**Supplementary Figure 3: Flow diagram showing inclusion/exclusion of cohort participants into the analysis**

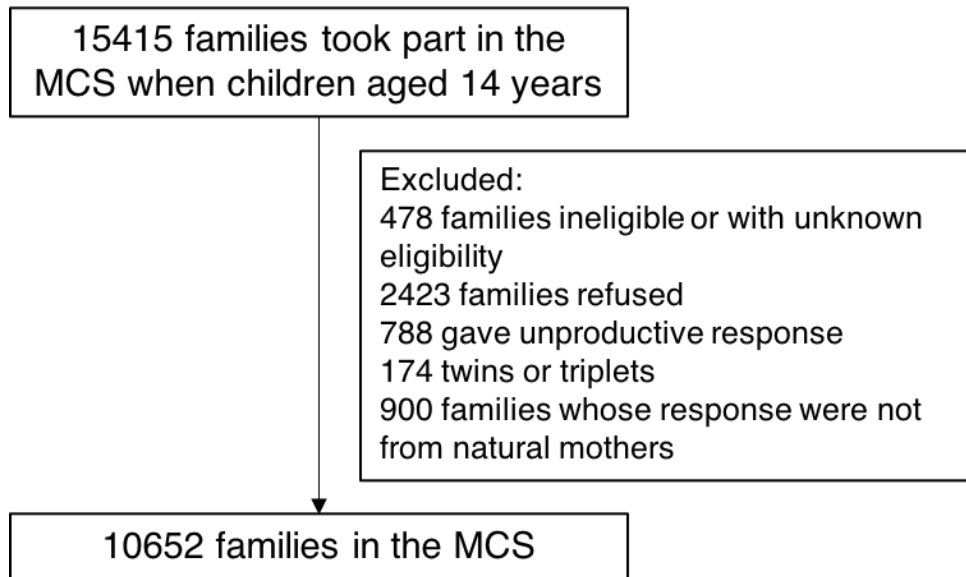

**Supplementary Table 1: Comparison between cohort participants with complete and missing observations**

|                                            | Participants with missing data | Participants with complete observations | Cohen's effect size |
|--------------------------------------------|--------------------------------|-----------------------------------------|---------------------|
| n                                          | 1506                           | 9146                                    |                     |
| Predicted poverty trajectories (%)         |                                |                                         | 0.36                |
| Never in poverty                           | 738 (49.0)                     | 5914 (64.7)                             |                     |
| Poverty in early childhood                 | 224 (14.9)                     | 1200 (13.1)                             |                     |
| Poverty in late childhood                  | 94 (6.2)                       | 436 (4.8)                               |                     |
| Persistent poverty                         | 450 (29.9)                     | 1596 (17.5)                             |                     |
| Socioemotional problem (SDQ $\geq$ 17) (%) | 291 (24.6)                     | 711 (7.8)                               | 0.58                |
| Obese (%)                                  | 73 (8.4)                       | 664 (7.3)                               | 0.04                |
| Longstanding illness (%)                   | 186 (15.6)                     | 1261 (13.8)                             | 0.05                |
| Maternal education (%)                     |                                |                                         | 0.27                |
| Higher degree                              | 30 (2.7)                       | 388 (4.2)                               |                     |
| First degree                               | 122 (10.8)                     | 1490 (16.3)                             |                     |
| Diploma                                    | 85 (7.5)                       | 897 (9.8)                               |                     |
| A-levels                                   | 88 (7.8)                       | 947 (10.4)                              |                     |
| GCSE A-C                                   | 394 (34.9)                     | 2989 (32.7)                             |                     |
| GCSE D-G                                   | 127 (11.3)                     | 884 (9.7)                               |                     |
| None                                       | 282 (25.0)                     | 1551 (17.0)                             |                     |
| Ethnicity (%)                              |                                |                                         | 0.01                |
| White                                      | 954 (84.6)                     | 7748 (84.7)                             |                     |
| Mixed                                      | 18 (1.6)                       | 74 (0.8)                                |                     |
| Indian                                     | 22 (2.0)                       | 241 (2.6)                               |                     |
| Pakistani and Bangladeshi                  | 70 (6.2)                       | 646 (7.1)                               |                     |
| Black or Black British                     | 54 (4.8)                       | 272 (3.0)                               |                     |
| Other ethnic groups                        | 9 (0.8)                        | 165 (1.8)                               |                     |
| Lone parenthood at 9 months                | 48 (4.2)                       | 240 (2.6)                               | 0.10                |
| Male                                       | 487 (42.4)                     | 4656 (50.9)                             | 0.17                |

**Supplementary table 2:** Weighted number of families in poverty in each wave of follow-up

| Follow-up time | Weighted count (%) |
|----------------|--------------------|
| 9 months       | 2702.6 (27.0)      |
| 3 years        | 2821.3 (28.0)      |
| 5 years        | 2845.6 (28.3)      |
| 7 years        | 2809.2 (28.1)      |
| 11 years       | 2915.4 (29.1)      |
| 14 years       | 2769.0 (27.6)      |

The following weighing variables were used in producing this table: the stratum variable is ptttype2 to account for stratified design of MCS; the clustering variable is sptn00 to account for data being clustered at ward level; the finite population correction factor is nh2 to measure how much extra precision we could achieve when the sample size become close to population size; and the survey weight is fovwt2 to account for attrition.

**Supplementary Table 3:** Associations of cumulative poverty and child health outcomes at child's age 14 years in the UK Millennium Cohort Study

| Model                | Outcomes                                            | Cumulative number of times of poverty |                        |                        |                        |                        |                        |                        |
|----------------------|-----------------------------------------------------|---------------------------------------|------------------------|------------------------|------------------------|------------------------|------------------------|------------------------|
|                      |                                                     | 0                                     | 1                      | 2                      | 3                      | 4                      | 5                      | 6                      |
| A                    | Socioemotional behavioural problems (SDQ $\geq$ 17) | Ref.                                  | 1.71<br>(1.19 to 2.44) | 3.04<br>(2.08 to 4.46) | 3.91 (2.76 to 5.54)    | 3.08<br>(2.05 to 4.62) | 5.06<br>(3.70 to 6.91) | 4.37<br>(3.17 to 6.03) |
|                      |                                                     | Ref.                                  | 1.27<br>(0.92 to 1.75) | 2.48<br>(1.72 to 3.59) | 1.66 (1.05 to 2.63)    | 1.75<br>(1.10 to 2.80) | 2.03<br>(1.31 to 3.14) | 2.61<br>(1.81 to 3.77) |
|                      | Obesity                                             | Ref.                                  | 0.94<br>(0.75 to 1.18) | 1.60<br>(1.23 to 2.08) | 1.62 (1.17 to 2.24)    | 1.16<br>(0.80 to 1.69) | 1.82<br>(1.38 to 2.40) | 1.32<br>(1.02 to 1.70) |
|                      |                                                     | Ref.                                  | 1.48<br>(0.98 to 2.25) | 2.34<br>(1.48 to 3.70) | 2.75<br>(1.73 to 4.38) | 2.02<br>(1.23 to 3.31) | 3.77<br>(2.51 to 5.68) | 2.70<br>(1.64 to 4.44) |
|                      | Obesity                                             | Ref.                                  | 1.12<br>(0.79 to 1.57) | 1.98<br>(1.36 to 2.89) | 1.39 (0.85 to 2.27)    | 1.28<br>(0.76 to 2.15) | 1.61<br>(0.99 to 2.63) | 2.19<br>(1.41 to 3.41) |
|                      |                                                     | Ref.                                  | 1.00<br>(0.78 to 1.28) | 1.80<br>(1.35 to 2.40) | 2.01 (1.40 to 2.88)    | 1.52<br>(1.02 to 2.26) | 2.06<br>(1.46 to 2.91) | 1.90<br>(1.29 to 2.79) |
| B                    | Socioemotional behavioural problems (SDQ $\geq$ 17) | Ref.                                  | 1.41<br>(0.92 to 2.15) | 2.50<br>(1.70 to 3.69) | 3.06 (2.07 to 4.52)    | 2.95<br>(1.91 to 4.57) | 3.53<br>(2.19 to 5.69) | 3.49<br>(2.33 to 5.22) |
|                      |                                                     | Ref.                                  | 1.18<br>(0.80 to 1.76) | 1.97<br>(1.28 to 3.03) | 1.47 (0.90 to 2.39)    | 1.56<br>(0.94 to 2.60) | 1.49<br>(0.96 to 2.32) | 1.76<br>(1.23 to 2.52) |
|                      | Obesity                                             | Ref.                                  | 1.03<br>(0.78 to 1.37) | 1.70<br>(1.31 to 2.22) | 1.78 (1.29 to 2.47)    | 1.47<br>(0.99 to 2.18) | 2.33<br>(1.62 to 3.34) | 1.94<br>(1.38 to 2.72) |
|                      |                                                     | Ref.                                  | 1.41<br>(0.92 to 2.15) | 2.50<br>(1.70 to 3.69) | 3.06 (2.07 to 4.52)    | 2.95<br>(1.91 to 4.57) | 3.53<br>(2.19 to 5.69) | 3.49<br>(2.33 to 5.22) |
|                      | Obesity                                             | Ref.                                  | 1.18<br>(0.80 to 1.76) | 1.97<br>(1.28 to 3.03) | 1.47 (0.90 to 2.39)    | 1.56<br>(0.94 to 2.60) | 1.49<br>(0.96 to 2.32) | 1.76<br>(1.23 to 2.52) |
|                      |                                                     | Ref.                                  | 1.03<br>(0.78 to 1.37) | 1.70<br>(1.31 to 2.22) | 1.78 (1.29 to 2.47)    | 1.47<br>(0.99 to 2.18) | 2.33<br>(1.62 to 3.34) | 1.94<br>(1.38 to 2.72) |
| Longstanding illness | Ref.                                                | 1.41<br>(0.92 to 2.15)                | 2.50<br>(1.70 to 3.69) | 3.06 (2.07 to 4.52)    | 2.95<br>(1.91 to 4.57) | 3.53<br>(2.19 to 5.69) | 3.49<br>(2.33 to 5.22) |                        |
|                      | Ref.                                                | 1.18<br>(0.80 to 1.76)                | 1.97<br>(1.28 to 3.03) | 1.47 (0.90 to 2.39)    | 1.56<br>(0.94 to 2.60) | 1.49<br>(0.96 to 2.32) | 1.76<br>(1.23 to 2.52) |                        |

Model A shows the crude associations of cumulative poverty and child health outcomes at child's age 14.

Model B shows complete case analysis (n=7475). The model adjusted for lone parenthood, maternal education and maternal ethnicity.

Model C shows analysis using multiple imputed datasets (n=10652). The model adjusted for lone parenthood, maternal education and maternal ethnicity.

**Supplementary Table 4:** Associations of predicted poverty trajectories using latent class analysis from age 9 months to 14 years and child health outcomes at child's age 14 years in the UK Millennium Cohort Study

| <b>Models</b> | <b>Odds ratio (OR)</b>                              | <b>Never in poverty</b> | <b>Poverty in early childhood</b> | <b>Poverty in late childhood</b> | <b>Persistent poverty</b> |
|---------------|-----------------------------------------------------|-------------------------|-----------------------------------|----------------------------------|---------------------------|
| A             | Socioemotional behavioural problems (SDQ $\geq$ 17) | Ref.                    | 2.10 (1.52 to 2.89)               | 2.82 (1.87 to 4.25)              | 3.03 (2.16 to 4.27)       |
|               | Obesity                                             | Ref.                    | 1.62 (1.19 to 2.21)               | 1.61 (1.02 to 2.53)              | 1.72 (1.23 to 2.41)       |
|               | Longstanding illness                                | Ref.                    | 1.35 (1.03 to 1.77)               | 2.99 (2.11 to 4.22)              | 1.91 (1.42 to 2.57)       |
| B             | Socioemotional behavioural problems (SDQ $\geq$ 17) | Ref.                    | 2.17 (1.68 to 2.80)               | 3.74 (2.68 to 5.22)              | 3.12 (2.36 to 4.13)       |
|               | Obesity                                             | Ref.                    | 1.65 (1.23 to 2.23)               | 1.51 (0.99 to 2.31)              | 1.54 (1.15 to 2.06)       |
|               | Longstanding illness                                | Ref.                    | 1.38 (1.10 to 1.75)               | 2.60 (1.95 to 3.47)              | 2.09 (1.63 to 2.68)       |

Models adjusted for lone parenthood, maternal education and maternal ethnicity. Model A is complete cases analysis (n=9146). Model B is analysis using multiple imputed datasets (n=10652).

**Supplementary Table 5:** Associations of predicted *subjective* poverty trajectories using latent class analysis from age 9 months to 14 years and child health outcomes at child's age 14 years in the UK Millennium Cohort Study

| <b>Odds ratio (OR)</b>                              | <b>Never in poverty</b> | <b>Poverty in early childhood</b> | <b>Poverty in late childhood</b> | <b>Persistent poverty</b> |
|-----------------------------------------------------|-------------------------|-----------------------------------|----------------------------------|---------------------------|
| Socioemotional behavioural problems (SDQ $\geq$ 17) | Ref.                    | 2.20 (1.65 to 2.92)               | 2.52 (1.89 to 3.35)              | 3.51 (2.79 to 4.42)       |
| Obesity                                             | Ref.                    | 1.68 (1.23 to 2.29)               | 1.56 (1.16 to 2.09)              | 2.06 (1.58 to 2.70)       |
| Longstanding illness                                | Ref.                    | 1.39 (1.10 to 1.76)               | 1.56 (1.27 to 1.93)              | 1.67 (1.39 to 2.01)       |

Models adjusted for lone parenthood, maternal education and maternal ethnicity.



**Supplementary table 6:** Weighted number of times of poverty of the cohort participants of the UK Millennium Cohort Study

| Number of times in poverty | Weighted count (%) |
|----------------------------|--------------------|
| 0                          | 3802.9 (49.5)      |
| 1                          | 1015.3 (13.2)      |
| 2                          | 560.9 (7.3)        |
| 3                          | 512.1 (6.7)        |
| 4                          | 505.9 (6.6)        |
| 5                          | 517.5 (6.7)        |
| 6                          | 764.6 (10.0)       |

## **Supplementary text box: Key recommendations to address child poverty in recent reports<sup>1-7</sup>**

Central and local government:

- Recommit to ending child poverty by making it a national priority<sup>1</sup>
- Recommit to record and report income child poverty<sup>2</sup>
- Adopt a “child health in all policies” approach to decision making and policy development<sup>2</sup>
- Ensure universal early years public health services are prioritised and supported financially, with targeted help for children and families in poverty<sup>2</sup>
- Review and implement systems of taxation, benefits, pensions and tax credits that provide a minimum living income for healthy lives, and reinstate the link between annual increases in benefit levels and inflation<sup>3-6</sup>
- Protect families from rising living costs by restoring the value of children’s benefits and protecting them with a triple lock, and providing free school meals for children in low income households<sup>1</sup>
- End costly delays and poor decision-making in the benefits system<sup>1</sup>
- Reform childcare/early years education to improve the quality, affordability and availability of childcare<sup>1 5</sup>
- Grant local government a greater role in deciding how public resources are used to improve the health and well-being of the communities they serve<sup>4</sup>
- Establish a commission to consider how businesses can ensure that their customers on a low income do not face paying the highest prices for goods and services<sup>5 6</sup>

Public Health England, Clinical Commissioning Groups and other National Health Service (NHS) agencies

- NHS Digital need to develop standards to ensure child health data are of high quality, captured to pre-specified definitions, and analysed consistently across the UK<sup>2</sup>
- Provide leadership to support health services and clinicians to reduce children’s exposure to poverty and its consequences<sup>4</sup>
- Encourage the provision of services in primary care to reduce poverty among people with chronic illness<sup>4</sup>

- Introduce systematic screening and referring for social determinants of health within primary care<sup>7</sup>

## References

1. Child Poverty Action Group. A programme for government 2015-2020. London: Child Poverty Action Group, 2015.
2. Royal College of Paediatrics and Child Health. State of Child Health Report 2017. In: Viner RM, ed. London: Royal College of Paediatrics and Child Health, 2017.
3. Marmot M, Atkinson T, Bell J, et al. Fair Society Healthy Lives: The Marmot Review. London: UCL Institute of Health Equity, 2010.
4. Whitehead M, Bambra C, Barr B, et al. Due North: Report of the Inquiry on Health Equity for the North. Liverpool, U.K.: Centre for Local Economic Strategies, University of Liverpool, 2014.
5. Joseph Rowntree Foundation. We can solve poverty in the UK. York: Joseph Rowntree Foundation, 2016.
6. End Child Poverty Coalition. Feeling the Pinch. London: End Child Poverty Coalition, 2017.
7. Chung EK, Siegel BS, Garg A, et al. Screening for Social Determinants of Health Among Children and Families Living in Poverty: A Guide for Clinicians. *Current problems in pediatric and adolescent health care* 2016;46(5):135-53. doi: 10.1016/j.cppeds.2016.02.004 [published Online First: 2016/04/23]
